# Supplementary material
Source: Springer Nature journal article supplement (https://www.springermedizin.de/resource/supplementary/13005_2009_147_MOESM3_ESM.pdf/9626360)

# TBV after more than 9 months

TBV  
[%]

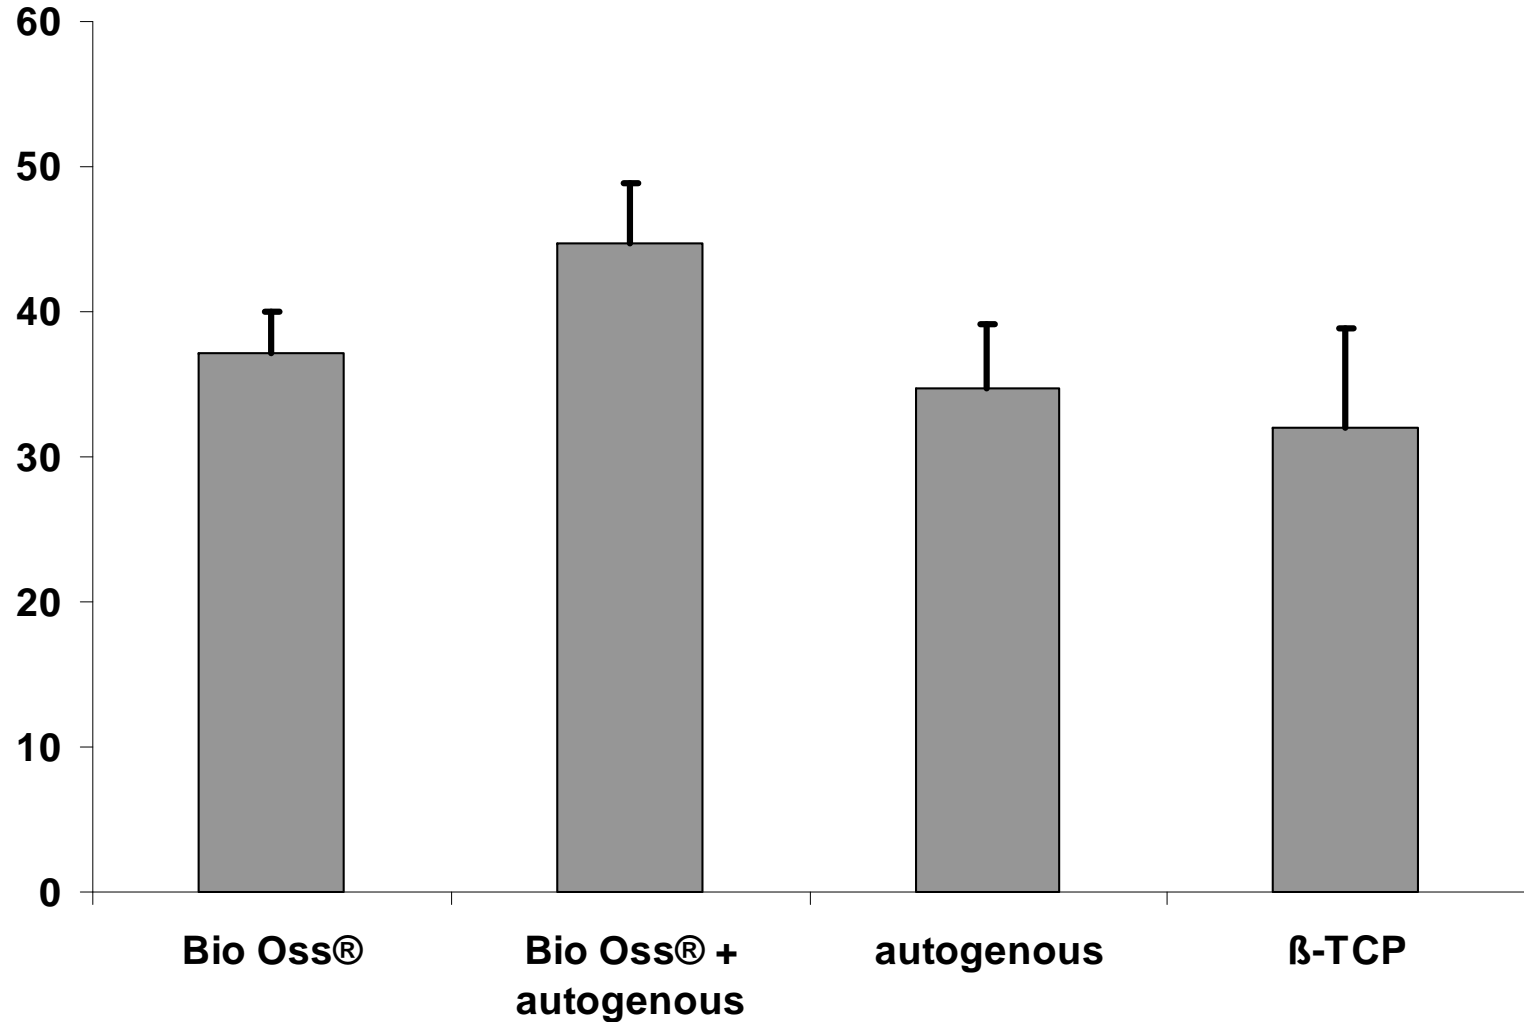

Supplement: MOESM3 [file 9626360]
